# Supplementary material for: Selective sensing performance of mesoporous carbon nitride with a highly ordered porous structure prepared from 3-amino-1,2,4-triazine
Source: Royal Society of Chemistry journal article supplement (doi:10.1039/c2ta01215d), 2012-12-12
Supplement: c2ta01215d.pdf [file c2ta01215d.pdf]

### Supporting information:

Raman spectroscopy was used to confirm the graphitic nature of the material. Two clear peaks can be clearly observed for the MCN-ATN-150 sample which can be assigned to G (graphitic) and D (disordered) bands. The G and D peaks observed in Raman spectrum are due to  $sp^2$  sites which are confirmed by XPS and EELS. The existence of a G-band ( $1550\text{ cm}^{-1}$ ) in Raman spectra suggests that well defined graphitic domains are indeed developed. Another band at around  $1370\text{ cm}^{-1}$  (D-band) is also observed. This band is the result of defects due to presence of nitrogen in the ring. The G peak is due to the bond stretching of all pairs of  $sp^2$  atoms in both rings and chains whereas the D peak is attributed to the breathing modes of  $sp^2$  atoms (C and N) in rings. Intensity ratio ( $I_G/I_D$ ) is found to be  $<1$ .

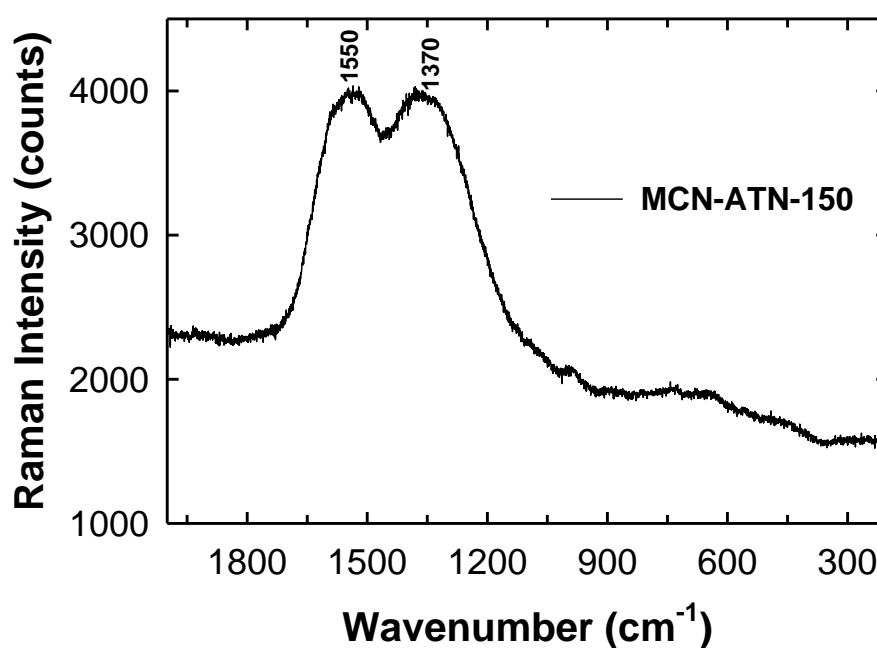

**Fig. S1:** Raman spectrum of MCN-ATN-150 sample.
